1 **Thermal cycling-hyperthermia in combination with**  
2 **polyphenols, epigallocatechin gallate and chlorogenic**  
3 **acid, exerts synergistic anticancer effect against**  
4 **human pancreatic cancer PANC-1 cells**

5

6

7 Chueh-Hsuan Lu<sup>1,2</sup>, Wei-Ting Chen<sup>1,2</sup>, Chih-Hsiung Hsieh<sup>1,2</sup>, Yu-Yi  
8 Kuo<sup>1,2</sup>, and Chih-Yu Chao<sup>1,2,3,\*</sup>

9

10 <sup>1</sup> Department of Physics, Lab for Medical Physics & Biomedical Engineering, National  
11 Taiwan University, Taipei 10617, Taiwan

12 <sup>2</sup> Biomedical & Molecular Imaging Center, National Taiwan University College of  
13 Medicine, Taipei 10051, Taiwan

14 <sup>3</sup> Institute of Applied Physics, National Taiwan University, Taipei 10617, Taiwan

15

16 \* Corresponding author

17 E-mail: cychao@phys.ntu.edu.tw (CYC)

18

19

20

21

22

23

24

25

26

27

28

29

30 **Keywords:** combination treatment, polyphenolic compound, pancreatic cancer,  
31 hyperthermia, synergistic effect

## 32 **Abstract**

33 Hyperthermia (HT) has shown feasibility and potency as an anticancer therapy.  
34 Administration of HT in the chemotherapy has previously enhanced the cytotoxicity of  
35 drugs against pancreatic cancer. However, the drugs used when conducting these  
36 studies are substantially conventional chemotherapeutic agents that may cause  
37 unwanted side effects. Additionally, the thermal dosage in the treatment of cancer cells  
38 could also probably harm the healthy cells. The purpose of this work was to investigate  
39 the potential of the two natural polyphenolic compounds, epigallocatechin gallate  
40 (EGCG) and chlorogenic acid (CGA), as heat synergizers in the thermal treatment of  
41 the PANC-1 cells. Furthermore, we have introduced a unique strategy entitled the  
42 thermal cycling-hyperthermia (TC-HT) that is capable of providing a maximum  
43 synergy and minimal side effect with the anticancer compounds. Our results  
44 demonstrate that the combination of the TC-HT and the CGA or EGCG markedly  
45 exerts the anticancer effect against the PANC-1 cells, while none of the single  
46 treatment induced such changes. The synergistic activity was attributed to the cell cycle  
47 arrest at the G2/M phase and the induction of the ROS-dependent  
48 mitochondria-mediated apoptosis. These findings not only represent the first *in vitro*

49 thermal synergistic study of natural compounds in the treatment of pancreatic cancer,  
50 but also highlight the potential of the TC-HT as an alternative strategy in thermal  
51 treatment.

52

## 53 **Introduction**

54 Pancreatic cancer is one of the leading causes in cancer death and remains one of  
55 the deadliest solid human malignancies worldwide [1]. Patients with pancreatic cancer  
56 are commonly diagnosed at the unresectable stage, and in most cases, patients with  
57 advanced pancreatic cancer have a poor response to chemotherapy or radiotherapy. In  
58 spite of the fact that therapeutic methods have been improved, the prognosis for  
59 pancreatic cancer patients still remains poor with a low five-year survival rate [2].  
60 Therefore, there is a need for continued research in novel agents or alternative  
61 therapeutic strategies for treating pancreatic cancers, thereby making an improvement  
62 for the patients' quality of life.

63 Hyperthermia (HT) has emerged as a promising method for treating cancer over  
64 the past decades [3]. It is a procedure exposing the tumor tissue to high temperatures  
65 that cause cancer cell damage and death. Researches have shown that HT exhibits

66 therapeutic potential against cancer cells through multiple cellular changes, such as  
67 protein denaturation and aggregation, inhibition of DNA synthesis, cytoskeleton  
68 disruption, and alteration in the calcium homeostasis [4-6]. In addition, HT can directly  
69 activate the immune response against the tumors, increase the tumor oxygenation, and  
70 improve the drug delivery [7-9]. Although these encouraging results have expanded our  
71 understanding of the cytotoxic effects of HT on the cancer cells, in the case of HT as  
72 single treatment, it has been shown not to be sufficient to kill cancer cells [10]. To  
73 strengthen the effectiveness of HT, several investigations have explored combinations  
74 of HT and other cancer therapies, such as radiotherapy and chemotherapy [11]. It has  
75 been demonstrated to be effective against various types of cancer, including pancreatic  
76 cancer, in that HT enhanced the cytotoxicity of gemcitabine through the inhibition of  
77 nuclear factor kappa B (NF- $\kappa$ B) [12-14]. There have also been reports of gemcitabine  
78 and other drugs, such as cisplatin and carbonplatin, combined with HT, that  
79 demonstrated the clinical efficacy in patients with pancreatic cancer [15, 16]. These  
80 data suggest that HT could modify the cytotoxicity of the anticancer drugs, thereby  
81 yielding better outcomes in treating pancreatic cancer. However, the drugs used in

82 these combined treatments are conventional chemotherapeutic drugs, which have been  
83 known to cause unpleasant and even dangerous side effects.

84 Nowadays, there has been an increasing interest in natural compounds research  
85 due to their lower toxicity and diverse biological properties. Phenolic compounds are  
86 among the most studied in cancer prevention and cure, and also the largest group of  
87 phytochemicals, as well as being widely distributed in our diet. Particularly, regular  
88 intakes of dietary polyphenols have been linked to lower risks of many cancers [17].  
89 Tea and coffee are two of the most consumed beverages worldwide, and the natural  
90 phenolic compounds, epigallocatechin gallate (EGCG) and chlorogenic acid (CGA),  
91 are the major components in both drinks, respectively. It has been shown that EGCG  
92 and CGA have healthy benefits such as antioxidative, anti-inflammatory, and  
93 anticancer activities [18-20]. Recently, published findings from animal experimental  
94 [21, 22] and clinical studies [23, 24] have demonstrated the ability of EGCG and CGA  
95 to suppress tumor cell growth such as breast, lung and bladder cancer. On the other  
96 hand, there are a number of studies indicating that natural compounds, including  
97 polyphenols, can act as heat synergizers, and thereby improve the anticancer effect  
98 [25-29]. Therefore, this has prompted us to conduct the first combined experiment of

99 HT and natural phenolic compounds in pancreatic cancer. Furthermore, we propose a  
100 novel approach named thermal cycling-hyperthermia (TC-HT), which allows cells to  
101 receive the equivalent thermal dosage through the repeated heat-and-cold cycle. As a  
102 matter of fact, there is some evidence indicating that HT lacks tumor selectivity and  
103 could also cause harm to normal cells [30, 31]. In this thermal cycled strategy, the cells  
104 could avoid prolonged continuous heating under thermal treatment, thereby reducing  
105 the toxicity of HT to highlight the synergistic anticancer efficiency of the combined  
106 therapy. Therefore, the aim of this study was to investigate the synergistic  
107 anti-pancreatic cancer effect of the TC-HT with the CGA and the TC-HT with the  
108 EGCG.

109 In this paper, we examined the effects of the EGCG or CGA combined with the  
110 TC-HT on the growth inhibition of PANC-1 cells and evaluated the cell cycle  
111 regulation, apoptosis, and the expression of associated proteins to elucidate their  
112 underlying mechanisms. Our results demonstrate that the co-administration with the  
113 TC-HT and the EGCG or CGA significantly inhibited the cell proliferation and  
114 increased the cell death by inducing the cell cycle arrest and mitochondrial apoptotic  
115 pathway. These findings first indicate that both the EGCG and CGA might be effective

116 heat synergizers and that the maximum synergistic effects on the PANC-1 cells could  
117 be obtained when the TC-HT was administered. Furthermore, the TC-HT as a thermal  
118 treatment could be much gentler and feasible, mainly because of the view that the  
119 TC-HT itself is relatively harmless to the cells. We believe that this study provides the  
120 interesting concept of cyclic thermal application in treatment of cancer *in vitro*, and  
121 highlights the potential of the TC-HT as an alternative thermal treatment.

122

## 123 **Materials and methods**

### 124 **Cell culture**

125 Human pancreatic cancer cell line PANC-1 was obtained from the Bioresource  
126 Collection and Research Center of the Food Industry Research and Development  
127 Institute (Hsinchu, Taiwan). Cells were plated in 75 cm<sup>3</sup> cell culture flasks and grown  
128 in high-glucose Dulbecco's modified Eagle's medium (DMEM) (Hyclone)  
129 supplemented with 10% fetal bovine serum (FBS) (Hyclone) and 1%  
130 penicillin-streptomycin (Gibco) in a humidified 5% CO<sub>2</sub> incubator at 37°C.

### 131 **Drug treatment and TC-HT exposure**

132 The EGCG was dissolved in distilled water at a concentration of 20 mM, and the CGA  
133 was dissolved in dimethyl sulfoxide (DMSO)(Sigma). Subsequently, the two samples  
134 were stored at -20°C. The stocks were diluted with a culture medium to the indicated  
135 concentration for treatment before usage, and the final concentration of DMSO in each  
136 well was 0.05% (v/v). After overnight incubation at 37°C, cells were treated with  
137 various concentrations of EGCG or CGA, as well as the solvent vehicle (0.05% DMSO)  
138 for CGA. For the TC-HT, the cells were subject to a high and low temperature water  
139 bath using a temperature controller modified by a PCR machine (**Fig 1A**). The cells  
140 were exposed to HT (1-cycle TC-HT) at 46°C for 30 min without a break or treated  
141 with 46-30°C TC-HT through 3, 6, and 10 cycles of 10, 5, and 3 min, respectively, to  
142 receive the equivalent thermal dosages (**Fig 1B**). In the combined treatment, cells in a  
143 medium containing the EGCG or CGA were exposed to the TC-HT. The temperatures  
144 of the cancer cells actually sensed were monitored by placing a needle thermocouple at  
145 the bottom of the well (**Fig 1C**). During heat exposure experiment, the non-heating  
146 groups (non-treated and drug-treated groups) were exposed to a similar ambient  
147 environment as the heating groups over the experimental period of time. After the



148 treatment was completed, cells were stored in a cell culture incubator until the time of  
149 analysis.

150

151 **Fig 1. Exposure to the TC-HT via a temperature controller.** (A)(B) Schematic of  
152 experiment setup and the TC-HT programs setting. (C) The actual temperature  
153 recorded every 20 sec in the PANC-1 cells throughout the exposure period.

154

## 155 **MTT assay**

156 Cell viability was accessed by 3-(4,5-dimethylthiazol-2-yl)-2,5-diphenyltetrazolium  
157 bromide (MTT) (Sigma) assay. Cells were seeded in 24-well plates and incubated  
158 overnight at 37°C. After a single-agent treatment or combined treatment of the TC-HT  
159 with the 0.05% DMSO (vehicle control), EGCG or CGA for 24 h, the medium was  
160 removed and the cells were washed with phosphate buffered saline (PBS). Cells were  
161 then incubated in DMEM containing 0.5 mg/ml MTT for an additional 4 h at 37°C.  
162 Then the medium was removed and DMSO was added to dissolve the formazan  
163 crystals. The supernatant from each sample was transferred into 96-well plates, and the  
164 absorbance was read at 570 nm using an ELISA microplate reader. The calculation of

165 synergism quotient (SQ) was dividing the combined effect by the sum of individual  
166 effects. The given treatment shows a synergy when SQ is greater than 1.0.

### 167 **Clonogenic survival assay**

168 PANC-1 cells were seeded at 1000 cells/dish in 35 mm Petri dishes for 24 h and treated  
169 with 0.05% DMSO (vehicle control), CGA, EGCG and TC-HT alone or in combination.  
170 Cell medium was replaced after the treatment, and the dishes were cultured in a  
171 humidified 5% CO<sub>2</sub> incubator at 37°C for additional 14 days. At last, the cells were  
172 fixed with 4% paraformaldehyde (PFA) (Sigma) for 10 min and stained with 0.1%  
173 crystal violet (Sigma). The colonies containing more than 50 cells were counted, and  
174 the number of colonies in each treatment group was normalized to control group.

### 175 **Cell cycle analysis**

176 Cells were seeded in 35 mm Petri dishes and incubated overnight at 37°C. After 24 h  
177 treatment with DMSO (vehicle control), CGA, EGCG and TC-HT alone or in  
178 combination, the cells were harvested, washed with PBS, and fixed with 70% ethanol at  
179 4°C for 30 min. The cells were then stained with propidium iodide (PI) (BD Bioscience)  
180 and RNase A (Thermal Scientific) for 30 min in the dark. The stained cells were

181 subject to the cell cycle analysis by using a flow cytometer (FACSCanto II; BD  
182 Biosciences), and data were analyzed with ModFit LT software.

### 183 **DAPI staining assay**

184 DAPI staining was used to detect morphological characteristics of the nucleus. Cells  
185 were cultured on glass coverslips in 35 mm Petri dishes. At the end of each 24 h  
186 treatment, cells were washed twice with PBS and fixed with 4% PFA for 10 min at  
187 room temperature. After washing twice with PBS, the glass coverslips with attached  
188 cells were mounted using Fluoroshield mounting medium with DAPI (Abcam) and  
189 examined with a fluorescence microscope (Axio Imager A1; ZEISS).

### 190 **Annexin-V/PI double staining assay**

191 Apoptosis was determined by using the Annexin V-FITC/PI apoptosis detection kit  
192 (BD Biosciences). Briefly, PANC-1 cells were treated with the TC-HT combined with  
193 the DMSO (vehicle control), CGA or EGCG, and then the cells were harvested with  
194 trypsin-EDTA (Gibco) and collected by centrifugation at  $2,000 \times g$  for 5 min, washed  
195 twice with cold PBS, and resuspended in binding buffer containing Annexin V-FITC  
196 and PI. The cell suspensions were incubated for 15 min at room temperature in the dark  
197 and analyzed by a FACS Calibur flow cytometer.

## 198 **Mitochondria membrane potential (MMP) measurement**

199 The cells treated with 0.05% DMSO (vehicle control), CGA, EGCG and TC-HT alone  
200 or in combination for 24h were harvested, and resuspended with PBS followed by  
201 staining with 20 nM DiOC<sub>6</sub>(3) (Enzo Life Sciences International Inc.) for 30 min at  
202 37°C in the dark. The fraction of cells showing low MMP was then measured by a flow  
203 cytometer.

## 204 **ROS detection**

205 Cellular Reactive Oxygen Species (ROS) levels of superoxide anion (O<sub>2</sub><sup>•-</sup>) were  
206 detected using the fluorescent dye dihydroethidium (DHE) (Sigma). Cells were treated  
207 with the indicated treatments, washed with PBS, and then incubated with 5 μM DHE  
208 for 30 min at 37°C in the dark. The fluorescence intensities were measured by flow  
209 cytometry and ROS levels were expressed as mean fluorescence intensity (MFI).

## 210 **Western blot analysis**

211 After treatment with CGA, EGCG, and TC-HT for 24 h alone or in combination, cells  
212 were harvested, washed with cold PBS, and lysed on ice for 30 min in lysis buffer (50  
213 mM Tris-HCl, pH 7.4, 150 mM NaCl, 0.25% deoxycholic acid, 1% NP-40, 1.0% Triton  
214 X-100, 0.1% SDS, 1 mM EDTA, 1% phosphate and protease inhibitor cocktail)

215 (Millipore). Cell lysates were clarified by centrifugation at  $23,000 \times g$  for 30 min at  $4^{\circ}\text{C}$ ,  
216 and the protein concentration in the supernatant fraction was quantified using the  
217 Bradford protein assay (Bioshop). Proteins were resolved by 10% SDS-PAGE and  
218 electrotransferred onto polyvinylidene fluoride membrane (PVDF) (Millipore) in  
219 transfer buffer (10 mM CAPS, pH 11.0, 10% methanol). The membranes were blocked  
220 with 5% nonfat dry milk/TBST (blocking buffer) for 1 h at room temperature and then  
221 incubated overnight at  $4^{\circ}\text{C}$  with diluted primary antibodies in blocking buffer. The  
222 specific primary antibodies against Bcl-2, cleaved caspase-8, cleaved caspase-9,  
223 cleaved caspase-3 (Cell Signaling), Bax (Santa Cruz), Cdc2, cyclin B1, cleaved PARP  
224 and  $\beta$ -actin (GeneTex) were used. After washing with TBST, the membranes were  
225 incubated with HRP-conjugated anti-goat (GeneTex) or anti-rabbit (Jackson  
226 Immunoresearch) secondary antibody. Chemiluminescence was detected using  
227 WesternBright ECL western blotting reagent (Advansta).

## 228 **Statistical analysis**

229 The results were presented as mean  $\pm$  standard deviation (SD). Statistical analysis using  
230 one-way analysis of variance (ANOVA) performed with SigmaPlot software. The

231 results were considered to be statistically significant when  $p$ -values were less than 0.05.

232 Each experiment was done in triplicate.

233

## 234 **Results**

### 235 **TC-HT in combination with polyphenols synergistically** 236 **inhibits proliferation of PANC-1 cells**

237 The TC-HT was performed by a modified PCR machine to raise the temperature to a

238 desired level followed by a rapid return to normothermic temperature. The actual

239 temperature in the cells measured by a needle thermocouple could be elevated from

240 36°C to 43.5, 44.2 and 44.9°C within 3, 5 and 10 min, respectively, and rapidly returned

241 to the physiological temperature (**Fig 1C**). The effect of the TC-HT and the CGA or

242 EGCG on cell growth was first explored using MTT assay. As shown in **Figs 2A** and

243 **2B**, cells were treated with various concentrations of the CGA or EGCG for 24 h, and

244 both of the compounds only slightly affected the viability of PANC-1 cells. DMSO

245 (0.05%) treated cells with or without the TC-HT did not show a significant difference

246 in viability compared to untreated control cells. Moreover, the viability of PANC-1

247 cells in response to treatment with the TC-HT decreased in a cycle-dependent manner.

248 When the TC-HT was combined with either of the two compounds, a significant  
249 dose-dependent decrease in viability was observed at all four cycling parameters.  
250 Although the 1-cycle TC-HT and either the compound cooperatively reduced the  
251 proliferation of PANC-1 cells, the heat alone resulted in significant cytotoxicity to the  
252 cells. Notably, there was no difference in the cell viability under the condition of the  
253 10-cycles TC-HT when compared to that in the control group, while it still was capable  
254 of working synergistically with either the CGA or the EGCG to exert the  
255 anti-proliferative activity. The SQ values for the corresponding treatments are as shown  
256 in **Table 1**. This suggests that both the CGA and the EGCG could exhibit a synergistic  
257 cytotoxic effect when co-administered with the TC-HT, particularly in the treatment of  
258 10 cycles. We next performed a clonogenic survival assay to confirm the effect of the  
259 TC-HT combined with CGA or EGCG on cell proliferation. As shown in **Figs 2C** and  
260 **2D**, colony formation in PANC-1 cells was dramatically reduced following both  
261 combined treatments. Based on these data, the 10-cycles TC-HT (43.5-36 °C) in  
262 combination with the concentration of 200 µM CGA, or the concentration of 20 µM  
263 EGCG, was used for all the following experiments.  
264

265 **Fig 2. Effects of CGA or EGCG combined with the TC-HT on proliferation in**  
266 **PANC-1 cells.** (A) The cells were treated with different cycle numbers of the TC-HT,  
267 various concentrations of CGA and 0.05% DMSO (vehicle control) alone or in  
268 combination for 24 h. (B) The cells were treated with different cycle numbers of the  
269 TC-HT and various concentrations of EGCG alone or in combination for 24 h. (C)  
270 Representative images of clonogenic survival assay. (D) Analysis of colony formation  
271 rate. Data are presented as mean  $\pm$  S.D. in triplicate.

272

273 **Table 1. Synergy quotient for CGA or EGCG in combination with the TC-HT.**

|                 |     | TC-HT   |          |          |           |
|-----------------|-----|---------|----------|----------|-----------|
|                 |     | 1-cycle | 3-cycles | 6-cycles | 10-cycles |
| CGA ( $\mu$ M)  | 100 | 0.84    | 0.86     | 1.08     | 1.51      |
|                 | 200 | 1.10    | 1.32     | 1.51     | 2.82      |
|                 | 300 | 1.11    | 1.34     | 1.38     | 2.40      |
| EGCG ( $\mu$ M) | 10  | 1.18    | 1.11     | 1.27     | 1.95      |
|                 | 20  | 1.28    | 1.35     | 1.76     | 3.09      |
|                 | 30  | 1.23    | 1.40     | 1.70     | 2.69      |



274

275 **The combination of CGA or EGCG with TC-HT caused**  
276 **G2/M cell cycle arrest in PANC-1 cells**

277 To evaluate the mode of the anti-proliferative effects of the TC-HT, CGA and  
278 EGCG, the cell cycle progression in the PANC-1 cells was examined by flow  
279 cytometric analysis. As shown in **Figs 3A** and **3B**, treatment with the CGA, EGCG, and  
280 TC-HT had no obvious effect on the cell progression when compared with the group of  
281 untreated cells. Also, 0.05% DMSO used as the solvent vehicle of CGA either alone or  
282 in combination with TC-HT had no effect on the cell progression. Interestingly, the  
283 TC-HT combined with either of the two polyphenols resulted in a significant  
284 accumulation of cells in the G2/M phase with a concomitant reduction of cells in the G1  
285 phase. To investigate the molecular mechanism of the results of the combined effect on  
286 the cell cycle distribution, we examined the relevant proteins involved in the G2/M  
287 progression. As shown in **Fig 3C**, the expression of Cdc2 and cyclin B1 were markedly  
288 reduced in response to the combined treatment with TC-HT and CGA or the combined  
289 treatment with TC-HT and EGCG. These results indicate that either the CGA or EGCG  
290 combined with the TC-HT synergistically induced cell cycle arrest in the G2/M phase

291 by decreasing cyclin B1 and Cdc2 in the cells, and eventually inhibited the cell growth  
292 of PANC-1 cells.

293

294 **Fig 3. Effects of CGA or EGCG combined with the TC-HT on the G2/M cell cycle**

295 **arrest in PANC-1 cells.** Cells were treated with the TC-HT (10 cycles), 0.05% DMSO

296 (vehicle control), CGA (200  $\mu$ M), and EGCG (20  $\mu$ M) alone or in combination (TC-HT

297 + DMSO, TC-HT + CGA, TC-HT + EGCG) for 24 h and stained with propidium iodide

298 (PI) for cell cycle analysis. (A) Representative DNA content profiles. (B) The

299 percentage of cell population in each phase of the cell cycle. (C) Western bolt analysis

300 of the expression of cell cycle regulator proteins cyclin B1 and Cdc2.  $\beta$ -actin was used

301 as an internal control. Data are presented as mean  $\pm$  S.D. in triplicate. (\*\*  $p < 0.01$  and

302 \*\*\*  $p < 0.001$  compared with the untreated control)

303

304 **TC-HT combined with CGA or EGCG induces apoptosis in**

305 **PANC-1 cells**

306 We then investigated as to whether the synergistic cytotoxic effect of the TC-HT

307 with the CGA or EGCG was associated with the induction of apoptosis, and the flow

308 cytometric analysis was performed using Annexin V-FITC/PI staining. As shown in  
309 **Figs 4A** and **4B**, the fraction of apoptotic cells after the treatment of PANC-1 cells with  
310 either the single agent CGA, or the EGCG or TC-HT were barely increased as  
311 compared with untreated control cells. There was no significant difference in apoptosis  
312 between the 0.05% DMSO (vehicle control) combined with or without TC-HT and the  
313 untreated control. Interestingly, the TC-HT in combination with the CGA significantly  
314 increased the early apoptotic cell death in PANC-1 cells ( $18.6\pm 5.2\%$ ). A similar result  
315 was also obtained in the combination of the TC-HT and the EGCG, but to a greater  
316 extent ( $24.3\pm 0.8\%$ ). These results also showed that the late apoptotic cell death was  
317 increased following the exposure of TC-HT with CGA ( $15.7\pm 4.6\%$ ) or EGCG  
318 ( $18.4\pm 4.6\%$ ). Furthermore, in contrast to control cells, the DAPI staining demonstrated  
319 that the cells treated with either of the two combined treatments had more condensed  
320 and fragmented nuclei, which are typical morphological alterations for the apoptosis  
321 (**Fig 4C**). These results suggest that the TC-HT has a potential synergistic effect with  
322 the CGA or EGCG on the apoptosis in the PANC-1 cells.

323

324 **Fig 4. Combination of the TC-HT and the CGA or EGCG induces apoptosis in**  
325 **PANC-1 cells.** The apoptosis analysis for the cells following the treatment with the  
326 TC-HT (10 cycles), 0.05% DMSO (vehicle control), CGA (200  $\mu$ M), and EGCG (20  
327  $\mu$ M) alone or in combination (TC-HT + DMSO, TC-HT + CGA, TC-HT + EGCG) for  
328 24 h. (A) Flow cytometric detection of the apoptosis with Annexin V-FITC/PI double  
329 staining. (B) Histogram quantifying the percentage of PANC-1 cells in early and late  
330 apoptosis. (C) The nuclei morphology alterations (arrow) were examined using DAPI  
331 staining. Data are presented as mean  $\pm$  S.D. in triplicate. (\*\*  $p < 0.01$  and \*\*\*  $p < 0.001$   
332 compared with the untreated control)

333

334 **Combination of the TC-HT with CGA or EGCG triggers**  
335 **significant loss in the mitochondrial membrane potential in**  
336 **PANC-1 cells**

337 Collapse of the mitochondrial integrity is a critical event in the cells undergoing  
338 apoptosis. To examine whether the combination of the TC-HT and CGA- or  
339 EGCG-induced apoptosis involved mitochondrial disruption, the mitochondrial  
340 membrane potential (MMP) was assessed using DiOC<sub>6</sub>(3) fluorescence staining by

341 flow cytometric analysis [32]. As shown in **Figs 5A** and **5B**, the treatment with the  
342 EGCG, the CGA and its corresponding vehicle control (0.05% DMSO) did not change  
343 the MMP level in comparison with the untreated control. In response to treatment with  
344 the TC-HT alone or together with vehicle control, there was no significant change in  
345 MMP within cells; however, the cells treated with TC-HT showed a stronger effect on  
346 the MMP depolarization after the administration of CGA or EGCG ( $44\pm6.4\%$  and  
347  $75.7\pm7.6\%$ ), which was consistent with the results of the apoptosis analysis as  
348 described in **Fig 4**. These results indicate that the TC-HT combined with the CGA- or  
349 EGCG-induced apoptosis in the PANC-1 cells is mediated by mitochondrial  
350 dysfunction.

351

352 **Fig 5. Combination of the TC-HT and the CGA or EGCG induces mitochondrial**  
353 **dysfunction.** (A) Flow cytometric analysis of MMP using DiOC<sub>6</sub>(3) after treatment  
354 with the TC-HT (10 cycles), 0.05% DMSO (vehicle control), CGA (200  $\mu$ M), and  
355 EGCG (20  $\mu$ M) alone or in combination (TC-HT + DMSO, TC-HT + CGA, TC-HT +  
356 EGCG) for 24 h. The M1 regions indicate the cells with the loss of MMP. (B)  
357 Histogram represents the percentage of cells in the M1 region. Data are presented as

358 mean  $\pm$  S.D. in triplicate. (\*\*  $p < 0.01$  and \*\*\*  $p < 0.001$  compared with the untreated  
359 control)

360

## 361 **Combination of the TC-HT with CGA or EGCG induces** 362 **apoptosis through the mitochondrial pathway**

363 It is well known that Bcl-2 family proteins and caspases, along with PARP, play  
364 important roles in the mitochondria-mediated apoptosis. To further explore the  
365 mechanism by which the TC-HT combined with the CGA or EGCG triggered apoptosis  
366 in the PANC-1 cells, we evaluated the expression of the apoptosis-related proteins  
367 using western blot analysis. As shown in **Fig 6**, when compared with control cells, the  
368 cleaved caspase-9, -3, and the cleaved PARP were markedly increased after the  
369 co-administration with the TC-HT and either the CGA or EGCG. In addition, both of  
370 the combined treatments down-regulated the expression of Bcl-2 and up-regulated the  
371 expression of Bax, and thus decreased the ratio of Bcl-2 to Bax. These results reveal  
372 that the TC-HT combined with the CGA or EGCG promotes apoptosis in the PANC-1  
373 cells via activation of the mitochondrial pathway.

374

375 **Fig 6. Effects of the TC-HT, CGA and EGCG on the expression of the**  
376 **apoptosis-related proteins in PANC-1 cells.** (A)(B) The protein levels of cleaved  
377 caspase-9, -3, cleaved PARP, Bcl-2 and Bax of the PANC-1 cells treated with the  
378 TC-HT (10 cycles), CGA (200  $\mu$ M) and EGCG (20  $\mu$ M) alone or in combination  
379 treatment (TC-HT + CGA, TC-HT + EGCG) for 24 h were examined by western blot  
380 analysis. GAPDH and  $\beta$ -actin were used as internal controls.

381

## 382 **The role of ROS in the TC-HT combined with the CGA- or** 383 **EGCG-induced apoptosis in PANC-1 cells**

384 As ROS generation is a critical event in the induction of the apoptosis, we next  
385 examined the role of ROS in apoptosis induced by treatment with the TC-HT in  
386 combination with either the CGA or EGCG. The intracellular ROS was measured by  
387 flow cytometry using a fluorescence probe, DHE, which reacts with  $O_2^{\bullet-}$  [33]. As  
388 shown in **Fig 7A**, the treatment of PANC-1 cells with 0.05% DMSO (vehicle control),  
389 CGA or EGCG alone did not alter the level of ROS when compared with the untreated  
390 control cells. Also, the level of ROS induced by TC-HT and its combination with  
391 DMSO were found to be comparable to the untreated control in the MFI. It is worth

392 mentioning that the TC-HT combined with CGA and the TC-HT combined with EGCG  
393 significantly increased the level of ROS in MFI by approximately 2.3- and 3.6-fold,  
394 respectively (**Fig 7B**). These results suggest that the TC-HT combined with the CGA or  
395 EGCG may induce apoptosis through the excessive ROS production in the PANC-1  
396 cells.

397

398 **Fig 7. Combined effects of the TC-HT and the CGA or EGCG on ROS generation**  
399 **in PANC-1 cells.** (A) The DHE ( $O_2^{\cdot-}$ ) levels were measured by flow cytometry after  
400 treatment with the TC-HT (10 cycles), 0.05% DMSO (vehicle control), CGA (200  $\mu$ M),  
401 and EGCG (20  $\mu$ M) alone or in combination (TC-HT + DMSO, TC-HT + CGA,  
402 TC-HT + EGCG) for 24 h. (B) Graph shows the fold change in MFI of DHE relative to  
403 control. Data are presented as mean  $\pm$  S.D. in triplicate. ( $^{**} p < 0.01$  and  $^{***} p < 0.001$   
404 compared with the untreated control)

405

## 406 **Discussion**

407 Despite previous studies having shown that HT or polyphenols, the EGCG and  
408 CGA, possessed anticancer activities against pancreatic cancer cells [34-37], the effect



409 of these two agents as a combined therapy on pancreatic cancer has not been reported.

410 In this study, we have explored as to whether the herbal compound, CGA or EGCG,

411 could cooperate with heat against the pancreatic cancer cells, and elucidated the cellular

412 mechanism underlying the biological effects. Our results have demonstrated that the

413 exposure to heat using the TC-HT in combination with the CGA or EGCG

414 synergistically inhibited the growth and induced the apoptosis in the PANC-1 cells.

415 Previous studies have shown the benefits of HT as an adjuvant in combination with

416 chemotherapy against many various cancers, including pancreatic cancer [13, 38, 39].

417 However, there is a major concern that HT can cause unavoidable thermal injury to

418 normal cells. Therefore, it is important to refine the method of heat administration to

419 achieve the desired thermal dosage with the minimal cytotoxicity. To the best of our

420 knowledge, this is the first report indicating a novel approach TC-HT synergizes with

421 the CGA or EGCG on pancreatic cancer PANC-1 cells.

422 Previous research has reported the response of PANC-1 cells to mild HT at

423 different temperatures [40]. Particularly, the temperature in a range of about 42 to 46°C

424 has been shown capable of inducing the cell death of the pancreatic cell line PANC-1.

425 Our survival analysis revealed a consistent result that the cell growth of PANC-1 in the

426 1-cycle group was significantly inhibited. Although HT has a cooperative cytotoxicity  
427 with the CGA or EGCG, its severe thermal toxicity to a cell is what we want to avoid.  
428 The usage of the repeated cycles of heat exposure could provide a means to synergize  
429 with the anticancer compounds in the heating process, and avoid the thermal damage  
430 accumulation in the following non-heating process. Earlier studies have shown the  
431 time-dependent modification of cancer cells during exposure to HT for which the  
432 analysis of cellular growth indicated that the survival rate decreased with increasing HT  
433 exposure time [41, 42]. Namely, the short exposure of cancer cells to HT may induce  
434 cellular stress without affecting their proliferation, while the prolonged exposure may  
435 lead to cytotoxicity. It has also been reported that short HT treatment of PANC-1 cells  
436 at the temperature 46°C for 5 min had no effect on cell viability [43]. Therefore, we  
437 suggest that the 10-cycles TC-HT induced stress rather than damage in cells during  
438 each heating cycle. As expected, the cells treated with the TC-HT of different cycling  
439 parameters exhibited a decreased cytotoxicity with the increased cycles. It is worth  
440 noting that 10 cycles of the TC-HT (43.5-36 °C), or either compound, did not cause a  
441 significant alteration in the viability, however, the combination of 10 cycles of the  
442 TC-HT with the CGA or EGCG strongly resulted in a dose-dependent decline of the

443 cell viability. Similar results from colony formation were also obtained with the cells  
444 treated with the combination of TC-HT and CGA or the combination of TC-HT and  
445 EGCG. These results suggested that the either CGA or EGCG may act as heat  
446 synergizer and co-administered with the use of the TC-HT could have significantly  
447 combined effects against pancreatic cancer PANC-1 cells. Furthermore, we have also  
448 tested one liver cancer (HepG2) and one non-cancerous (HEK293) cell lines to  
449 examine the combined action. Results shown in **S1 Fig** revealed that the 10-cycles  
450 TC-HT did not cause cytotoxicity in both cancer and non-cancerous cells.  
451 Interestingly, such substantial cell death in the PANC-1 cells treated with the TC-HT  
452 in combination with CGA or EGCG was not observed in the HepG2 and HEK293  
453 cells, which indicated cell specificity of the combination treatments.

454 HT has been demonstrated to inhibit the growth of human cancer cells through  
455 interfering with the cell cycle progression [27, 29, 44]. In our results, we found that the  
456 TC-HT did not cause an obvious accumulation of cells in the G2/M phase. When cells  
457 undergoing the TC-HT were given the CGA or EGCG concurrently, the proportion of  
458 cells in the G2/M phase was significantly increased. Additionally, this observation was  
459 supported by the marked downregulation of Cdc2 and cyclin B1 proteins in the

460 combination of the TC-HT and the CGA or EGCG. The Cdc2 (cell division cycle 2),  
461 also known as the CDK1 (cyclin-dependent kinase 1), is a core regulator that drives the  
462 cells through G2 and into mitosis. Several studies have reported that the binding of  
463 Cdc2 to cyclin B1 complex plays an important role in the G2/M progression [45, 46].  
464 Collectively, these results indicated that the synergistic cytotoxicity of CGA or EGCG  
465 under the exposure of TC-HT, at least in part, was associated with the inhibition of the  
466 Cdc2/cyclin B1 kinase activity.

467 Apoptosis, also the best known form of programmed cell death, plays a pivotal  
468 role in defending against cancer. The conventional HT has been demonstrated to  
469 affect apoptotic pathways in various types of cancer cells [47]. It has also been  
470 reported that polyphenols exhibit anticancer activities against different human cancer  
471 cells through activating the apoptotic pathway [48, 49]. However, in our study, the  
472 results of apoptosis analysis performed using FITC Annexin V and PI double staining  
473 indicated that neither the TC-HT nor these two compounds induced significant  
474 apoptotic cells (**Fig 4**). Only when the TC-HT in combination with the CGA or  
475 EGCG was conducted, both of the combined treatments significantly elevated the  
476 percentage of the early and late apoptotic cells. This finding was further confirmed by

477 the nuclear morphological alterations of the apoptosis in the TC-HT-treated cells in  
478 combination with the CGA or EGCG. The apoptotic process can be divided into the  
479 death receptor and mitochondrial pathways, and the mitochondrial pathway of cell  
480 death is thought to be the major mechanism of apoptosis in mammals. The Bcl-2  
481 family proteins are key regulators of the mitochondrial apoptotic pathway, which  
482 comprise of both the anti-apoptotic and pro-apoptotic members. Unbalanced  
483 Bcl-2/Bax ratio within the cells induces the disruption of the mitochondrial membrane,  
484 release of cytochrome *c*, activation of caspases, and the subsequent cleavage of PARP  
485 [50, 51]. Results from **Figs 5** and **6** indicated that the combined treatment with the  
486 TC-HT and the CGA or EGCG markedly decreased the level of MMP and Bcl-2  
487 expression, and increased Bax expression. We also found that the activation of  
488 caspase-9, -3, and the cleavage of PARP were promoted with both of the combined  
489 treatments (**Fig 6**). Collectively, these data indicated that the mitochondria-dependent  
490 pathway is involved in the synergistic apoptosis following the combined treatments.

491 Mitochondria are widely believed to be the main cellular source of ROS. The  
492 excessive production of ROS could result in mitochondrial dysfunction, which in turn  
493 triggers the apoptosis [52]. We then confirmed if the observation of mitochondrial

494 dysfunction in cells treated with the TC-HT in combination with the CGA or EGCG  
495 was promoted by ROS generation. Our result showed that the cellular ROS generation  
496 was elevated significantly following the administration of combination of the TC-HT  
497 with the CGA or EGCG, indicating that the high levels of ROS production played an  
498 important role in the apoptosis induced by the combination of the TC-HT with CGA  
499 and the TC-HT with EGCG. HT has been known to act as an adjuvant treatment  
500 modality to improve the cytotoxicity of several anticancer agents such as  
501 chemotherapeutic drugs [53-55] and herbal compounds [56, 57]. It is thought that HT  
502 can enhance the sensitivity of cancer cells to treatment with drugs [58], thereby  
503 presenting synergistic anticancer activity. Therefore, these observations of this study  
504 tempted us to suggest that the heat stress during temperature cycles may contribute to  
505 the potentiation of the CGA or EGCG-triggered cytotoxic responses. Most  
506 importantly, the TC-HT could serve as a mild approach to synergize with the natural  
507 compound, CGA or EGCG. Furthermore, we also investigate the feasibility of the  
508 TC-HT by using standard clinical compound gemcitabine shown to exhibit thermal  
509 enhancement of cytotoxicity when combined with standard HT [53, 59]. Similar result  
510 as the combination of 1-cycle TC-HT and gemcitabine was observed from analysis of

511 cell viability in the combined treatment with the 10-cycles TC-HT and gemcitabine,  
512 whereas the 10-cycles TC-HT alone had no effect on cell viability (**S2 Fig**). This  
513 finding suggests that this approach could be potentially extended to other anticancer  
514 agent with heat synergy in cancer research. In practices, the type of thermal therapy is  
515 usually associated with the location of tumor. At present time, the TC-HT  
516 methodology might have difficulty in applying rapidly cycling heat on centrally  
517 located malignancies *in vivo*. Further researches need to be conducted to overcome  
518 this problem.

519 In conclusion, a novel method for producing a desired thermal dosage is  
520 proposed in which it applies repeated thermal treatments of short exposure to prevent  
521 the toxic effects from prolonged exposure. Our findings have demonstrated the  
522 TC-HT shows capability of synergizing with the natural compound, CGA or EGCG,  
523 and minimizing the thermal damage resulting from HT. The synergistic activity  
524 against the PANC-1 cells was performed primarily via the G2/M arrest and the  
525 apoptosis induced through the ROS-mediated mitochondrial pathway leading to an  
526 imbalance between Bcl-2 and Bax, activation of caspase-9 and -3, and the cleavage of  
527 PARP. This study represents an interesting concept of cyclic thermal application in

528 treatment of cancer *in vitro*, which may potentially demonstrate an alternative to heat  
529 treatment. Gaining an optimal combined effect for a variety of cancers via the  
530 examination of the relation between the TC-HT parameters and other anticancer drugs  
531 is an attractive subject that warrants further investigation.

532

### 533 **Funding**

534 This work was supported by grants from Ministry of Science and Technology  
535 (MOST 105-2112-M-002-006-MY3 to CYC) and Ministry of Education (MOE  
536 106R880708 to CYC) of the Republic of China. The funders had no role in study  
537 design, data collection and analysis, decision to publish, or preparation of the  
538 manuscript.

539

### 540 **Competing Interests**

541 The authors have declared that no competing interests exist.

542

### 543 **Acknowledgments**



544 We would like to thank Technology Commons in College of Life Science,  
545 National Taiwan University for use of flow cytometry system, and the staff of the  
546 imaging core at the First Core Labs, National Taiwan University Hospital for  
547 technical assistance.

548

549

## 550 **Author Contributions**

551 **Conceptualization:** Chih-Yu Chao.

552 **Data Curation:** Chueh-Hsuan Lu.

553 **Formal analysis:** Chueh-Hsuan Lu, Wei-Ting Chen, Chih-Hsiung Hsieh, Yu-Yi Kuo,

554 Chih-Yu Chao.

555 **Funding acquisition:** Chih-Yu Chao.

556 **Investigation:** Chueh-Hsuan Lu, Chih-Yu Chao.

557 **Project Administration:** Chih-Yu Chao.

558 **Resources:** Chih-Hsiung Hsieh, Chih-Yu Chao.

559 **Supervision:** Chih-Yu Chao.

560 **Validation:** Chueh-Hsuan Lu.

561 **Writing – original draft:** Chueh-Hsuan Lu, Wei-Ting Chen, Chih-Yu Chao.

562 **Writing – review & editing:** Chih-Yu Chao.

563

564 **Submission**

565 *PLOS ONE*

566 <https://journals.plos.org/plosone/>

567 Manuscript received 25 May 2018; 1<sup>st</sup> revision 31 Oct 2018; 2<sup>nd</sup> revision 2 Jan 2019;

568 3<sup>rd</sup> revision 5 Mar 2019; 4<sup>th</sup> revision 29 Apr 2019; accepted for publication 16 May 2019.

569

570

## 571 **References**

572 1. Siegel RL, Miller KD, Jemal A. Cancer statistics, 2016. *CA Cancer J Clin.*

573 2016;66(1):7-30. doi: 10.3322/caac.21332. PubMed PMID: 26742998.

574 2. Fryer RA, Galustian C, Dagleish AG. Recent advances and developments in

575 treatment strategies against pancreatic cancer. *Curr Clin Pharmacol.* 2009;4(2):102-12.

576 PubMed PMID: 19442075.

577 3. Overgaard J. The Current and Potential Role of Hyperthermia in Radiotherapy.

578 *Int J Radiat Oncol.* 1989;16(3):535-49.

579 4. Roti JLR. Cellular responses to hyperthermia (40-46 degrees C): Cell killing and

580 molecular events. *Int J Hyperther.* 2008;24(1):3-15. doi:

581 10.1080/02656730701769841. PubMed PMID: WOS:000252581400002.

582 5. Oei AL, Vriend LEM, Crezee J, Franken NAP, Krawczyk PM. Effects of

583 hyperthermia on DNA repair pathways: one treatment to inhibit them all. *Radiat*

584 *Oncol.* 2015;10. doi: ARTN 165

585 10.1186/s13014-015-0462-0. PubMed PMID: WOS:000358983800001.

- 586 6. Huang SH, Yang KJ, Wu JC, Chang KJ, Wang SM. Effects of hyperthermia on  
587 the cytoskeleton and focal adhesion proteins in a human thy carcinoma cell line. J  
588 Cell Biochem. 1999;75(2):327-37. doi: Doi  
589 10.1002/(Sici)1097-4644(19991101)75:2<327::Aid-Jcb14>3.0.Co;2-G. PubMed  
590 PMID: WOS:000082783600014.
- 591 7. Calderwood SK, Theriault JR, Gong JL. How is the immune response affected  
592 by hyperthermia and heat shock proteins? Int J Hyperther. 2005;21(8):713-6. doi:  
593 10.1080/02656730500340794. PubMed PMID: WOS:000233906600007.
- 594 8. Ponce AM, Vujaskovic Z, Yuan F, Needham D, Dewhirst MW. Hyperthermia  
595 mediated liposomal drug delivery. Int J Hyperther. 2006;22(3):205-13. doi:  
596 10.1080/02656730600582956. PubMed PMID: WOS:000238093900004.
- 597 9. Song CW, Shakil A, Osborn JL, Iwata K. Tumour oxygenation is increased by  
598 hyperthermia at mild temperatures. Int J Hyperther. 2009;25(2):91-5. doi: Pii  
599 910057702  
600 10.1080/02656730902744171. PubMed PMID: WOS:000264750400001.
- 601 10. Hildebrandt B, Wust P, Ahlers O, Dieing A, Sreenivasa G, Kerner T, et al. The  
602 cellular and molecular basis of hyperthermia. Crit Rev Oncol Hematol.  
603 2002;43(1):33-56. PubMed PMID: 12098606.
- 604 11. Kaur P, Hurwitz MD, Krishnan S, Asea A. Combined hyperthermia and  
605 radiotherapy for the treatment of cancer. Cancers (Basel). 2011;3(4):3799-823. doi:  
606 10.3390/cancers3043799. PubMed PMID: 24213112; PubMed Central PMCID:  
607 PMC3763397.
- 608 12. Au JLS, Wientjes MG. Combination Intravesical Hyperthermia and  
609 Chemotherapy for Bladder Cancer The Rampersaud/Vujaskovic/Inman Article  
610 Reviewed. Oncology-Ny. 2010;24(12):1155-60. PubMed PMID:  
611 WOS:000293341400009.
- 612 13. Adachi S, Kokura S, Okayama T, Ishikawa T, Takagi T, Handa O, et al. Effect of  
613 hyperthermia combined with gemcitabine on apoptotic cell death in cultured human  
614 pancreatic cancer cell lines. Int J Hyperthermia. 2009;25(3):210-9.
- 615 14. Refaat T, Sachdev S, Sathiaseelan V, Helenowski I, Abdelmoneim S, Pierce MC,  
616 et al. Hyperthermia and radiation therapy for locally advanced or recurrent breast  
617 cancer. Breast. 2015;24(4):418-25. doi: 10.1016/j.breast.2015.03.008. PubMed PMID:  
618 25900383; PubMed Central PMCID: PMC3763397.
- 619 15. Bakshandeh-Bath A, Stoltz AS, Homann N, Wagner T, Stolting S, Peters SO.  
620 Preclinical and Clinical Aspects of Carboplatin and Gemcitabine Combined with

- 621 Whole-body Hyperthermia for Pancreatic Adenocarcinoma. *Anticancer Res.*  
622 2009;29(8):3069-77. PubMed PMID: WOS:000268846800029.
- 623 16. Tschoep-Lechner KE, Milani V, Berger F, Dieterle N, Abdel-Rahman S, Salat C,  
624 et al. Gemcitabine and cisplatin combined with regional hyperthermia as second-line  
625 treatment in patients with gemcitabine-refractory advanced pancreatic cancer. *Int J*  
626 *Hyperther.* 2013;29(1):8-16. doi: 10.3109/02656736.2012.740764. PubMed PMID:  
627 WOS:000313672700002.
- 628 17. Scalbert A, Williamson G. Dietary intake and bioavailability of polyphenols. *J*  
629 *Nutr.* 2000;130(8):2073s-85s. PubMed PMID: WOS:000088760200003.
- 630 18. Richelle M, Tavazzi I, Offord E. Comparison of the antioxidant activity of  
631 commonly consumed polyphenolic beverages (coffee, cocoa, and tea) prepared per  
632 cup serving. *J Agr Food Chem.* 2001;49(7):3438-42. doi: DOI 10.1021/jf0101410.  
633 PubMed PMID: WOS:000170043400047.
- 634 19. Min KJ, Kwon TK. Anticancer effects and molecular mechanisms of  
635 epigallocatechin-3-gallate. *Integr Med Res.* 2014;3(1):16-24. doi:  
636 10.1016/j.imr.2013.12.001. PubMed PMID: 28664074; PubMed Central PMCID:  
637 PMC5481703.
- 638 20. Belkaid A, Currie JC, Desgagnes J, Annabi B. The chemopreventive properties  
639 of chlorogenic acid reveal a potential new role for the microsomal  
640 glucose-6-phosphate translocase in brain tumor progression. *Cancer Cell Int.* 2006;6:7.  
641 doi: 10.1186/1475-2867-6-7. PubMed PMID: 16566826; PubMed Central PMCID:  
642 PMC1440869.
- 643 21. Xu RS, Kang QM, Ren J, Li ZK, Xu XP. Antitumor Molecular Mechanism of  
644 Chlorogenic Acid on Inducing Genes GSK-3 beta and APC and Inhibiting Gene  
645 beta-Catenin (vol 2013, 951319, 2013). *J Anal Methods Chem.* 2015. doi: Artn  
646 189328  
647 10.1155/2015/189328. PubMed PMID: WOS:000352383000001.
- 648 22. Feng RT, Lu YJ, Bowman LL, Qian Y, Castranova V, Ding M. Inhibition of  
649 activator protein-1, NF-kappa B, and MAPKs and induction of phase 2 detoxifying  
650 enzyme activity by chlorogenic acid. *J Biol Chem.* 2005;280(30):27888-95. doi:  
651 10.1074/jbc.M503347200. PubMed PMID: WOS:000230678600051.
- 652 23. Zhao H, Zhu W, Jia L, Sun X, Chen G, Zhao X, et al. Phase I study of topical  
653 epigallocatechin-3-gallate (EGCG) in patients with breast cancer receiving adjuvant  
654 radiotherapy. *Br J Radiol.* 2016;89(1058):20150665. Epub 2015/11/27. doi:  
655 10.1259/bjr.20150665. PubMed PMID: 26607642; PubMed Central PMCID:

- 656 PMCPMC4985212.
- 657 24. Gee JR, Saltzstein DR, Kim K, Kolesar J, Huang W, Havighurst TC, et al. A  
658 Phase II Randomized, Double-blind, Presurgical Trial of Polyphenon E in Bladder  
659 Cancer Patients to Evaluate Pharmacodynamics and Bladder Tissue Biomarkers.  
660 *Cancer Prev Res.* 2017;10(5):298-307. doi: 10.1158/1940-6207.Capr-16-0167.  
661 PubMed PMID: WOS:000400625500005.
- 662 25. Kim JH, Kim SH, Alfieri AA, Young CW. Quercetin, an Inhibitor of Lactate  
663 Transport and a Hyperthermic Sensitizer of Hela-Cells. *Cancer Res.* 1984;44(1):102-6.  
664 PubMed PMID: WOS:A1984RX69400019.
- 665 26. Cui ZG, Piao JL, Kondo T, Ogawa R, Tsuneyama K, Zhao QL, et al. Molecular  
666 mechanisms of hyperthermia-induced apoptosis enhanced by docosaheaxaenoic acid:  
667 Implication for cancer therapy. *Chem-Biol Interact.* 2014;215:46-53. doi:  
668 10.1016/j.cbi.2014.03.005. PubMed PMID: WOS:000336357600007.
- 669 27. Zhao PJ, Jiang H, Su D, Feng JG, Ma SL, Zhu XH. Inhibition of cell  
670 proliferation by mild hyperthermia at 43 degrees C with Paris Saponin I in the lung  
671 adenocarcinoma cell line PC-9. *Mol Med Rep.* 2015;11(1):327-32. doi:  
672 10.3892/mmr.2014.2655. PubMed PMID: WOS:000346651100045.
- 673 28. Cui ZG, Piao JL, Rehman MUR, Ogawa R, Li P, Zhao QL, et al. Molecular  
674 mechanisms of hyperthermia-induced apoptosis enhanced by withaferin A. *Eur J*  
675 *Pharmacol.* 2014;723:99-107. doi: 10.1016/j.ejphar.2013.11.031. PubMed PMID:  
676 WOS:000330574600014.
- 677 29. Hatashita M, Taniguchi M, Baba K, Koshiha K, Sato T, Jujo Y, et al. Sinodielide  
678 A exerts thermosensitizing effects and induces apoptosis and G2/M cell cycle arrest in  
679 DU145 human prostate cancer cells via the Ras/Raf/MAPK and PI3K/Akt signaling  
680 pathways. *Int J Mol Med.* 2014;33(2):406-14. doi: 10.3892/ijmm.2013.1568. PubMed  
681 PMID: 24285252.
- 682 30. Dewey WC. Arrhenius Relationships from the Molecule and Cell to the Clinic.  
683 *Int J Hyperther.* 1994;10(4):457-83. doi: Doi 10.3109/02656739409009351. PubMed  
684 PMID: WOS:A1994NX92300001.
- 685 31. Sminia P, Vanderzee J, Wondergem J, Haveman J. Effect of Hyperthermia on the  
686 Central-Nervous-System - a Review. *Int J Hyperther.* 1994;10(1):1-30.
- 687 32. Korchak HM, Rich AM, Wilkenfeld C, Rutherford LE, Weissmann G. A  
688 carbocyanine dye, DiOC6(3), acts as a mitochondrial probe in human neutrophils.  
689 *Biochem Biophys Res Commun.* 1982;108(4):1495-501. PubMed PMID: 7181903.
- 690 33. Gomes A, Fernandes E, Lima JL. Fluorescence probes used for detection of

- 691 reactive oxygen species. *Journal of biochemical and biophysical methods*.  
692 2005;65(2-3):45-80.
- 693 34. Xiaoping L, Leizhen Z. Advances of high intensity focused ultrasound (HIFU)  
694 for pancreatic cancer. *Int J Hyperthermia*. 2013;29(7):678-82. doi:  
695 10.3109/02656736.2013.837199. PubMed PMID: 24102396.
- 696 35. Wang K, Chen L, Meng Z, Lin J, Zhou Z, Wang P, et al. High intensity focused  
697 ultrasound treatment for patients with advanced pancreatic cancer: a preliminary  
698 dosimetric analysis. *Int J Hyperthermia*. 2012;28(7):645-52. doi:  
699 10.3109/02656736.2012.713541. PubMed PMID: 22946544.
- 700 36. Bimonte S, Cascella M, Leongito M, Palaia R, Caliendo D, Izzo F, et al. An  
701 overview of pre-clinical studies on the effects of (-)-epigallocatechin-3-gallate, a  
702 catechin found in green tea, in treatment of pancreatic cancer. *Recenti Prog Med*.  
703 2017;108(6):282-7. Epub 2017/06/21. doi: 10.1701/2715.27715. PubMed PMID:  
704 28631776.
- 705 37. Dong J, Zou J, Yu XF. Coffee drinking and pancreatic cancer risk: a  
706 meta-analysis of cohort studies. *World J Gastroenterol*. 2011;17(9):1204-10. Epub  
707 2011/03/31. doi: 10.3748/wjg.v17.i9.1204. PubMed PMID: 21448427; PubMed  
708 Central PMCID: PMC3063915.
- 709 38. Miyamoto R, Oda T, Hashimoto S, Kurokawa T, Inagaki Y, Shimomura O, et al.  
710 Cetuximab delivery and antitumor effects are enhanced by mild hyperthermia in a  
711 xenograft mouse model of pancreatic cancer. *Cancer Sci*. 2016;107(4):514-20.
- 712 39. Issels RD. Hyperthermia adds to chemotherapy. *Eur J Cancer*.  
713 2008;44(17):2546-54. doi: 10.1016/j.ejca.2008.07.038. PubMed PMID: 18789678.
- 714 40. Ware MJ, Nguyen LP, Law JJ, Krzykawska-Serda M, Taylor KM, Cao HST, et al.  
715 A new mild hyperthermia device to treat vascular involvement in cancer surgery. *Sci*  
716 *Rep*. 2017;7(1):11299. doi: 10.1038/s41598-017-10508-6. PubMed PMID: 28900126;  
717 PubMed Central PMCID: PMC5595878.
- 718 41. Dewey WC, Hopwood LE, Sapareto SA, Gerweck LE. Cellular responses to  
719 combinations of hyperthermia and radiation. *Radiology*. 1977;123(2):463-74. Epub  
720 1977/05/01. doi: 10.1148/123.2.463. PubMed PMID: 322205.
- 721 42. Raaphorst GP, Freeman ML, Dewey WC. Radiosensitivity and recovery from  
722 radiation damage in cultured CHO cells exposed to hyperthermia at 42.5 or 45.5  
723 degrees C. *Radiat Res*. 1979;79(2):390-402. PubMed PMID: 482603.
- 724 43. Curley SA, Palalon F, Sanders KE, Koshkina NV. The Effects of Non-Invasive  
725 Radiofrequency Treatment and Hyperthermia on Malignant and Nonmalignant Cells.

- 726 Int J Env Res Pub He. 2014;11(9):9142-53. doi: 10.3390/ijerph110909142. PubMed  
727 PMID: WOS:000342027500031.
- 728 44. Lim CU, Zhang Y, Fox MH. Cell cycle dependent apoptosis and cell cycle  
729 blocks induced by hyperthermia in HL-60 cells. Int J Hyperthermia. 2006;22(1):77-91.  
730 doi: 10.1080/02656730500430538. PubMed PMID: 16423754.
- 731 45. Jesus C, Beach D. Oscillation of Mpf Is Accompanied by Periodic Association  
732 between Cdc25 and Cdc2-Cyclin-B. Cell. 1992;68(2):323-32. doi: Doi  
733 10.1016/0092-8674(92)90473-P. PubMed PMID: WOS:A1992HB35300011.
- 734 46. Fisher D, Krasinska L, Coudreuse D, Novak B. Phosphorylation network  
735 dynamics in the control of cell cycle transitions. J Cell Sci. 2012;125(Pt 20):4703-11.  
736 doi: 10.1242/jcs.106351. PubMed PMID: 23223895.
- 737 47. Ahmed K, Tabuchi Y, Kondo T. Hyperthermia: an effective strategy to induce  
738 apoptosis in cancer cells. Apoptosis. 2015;20(11):1411-9. doi:  
739 10.1007/s10495-015-1168-3. PubMed PMID: 26354715.
- 740 48. Rodríguez M, Estrela J, Ortega Á. Natural polyphenols and apoptosis induction  
741 in cancer therapy. J Carcinog Mutag S. 2013;6.
- 742 49. Yamagata K, Izawa Y, Onodera D, Tagami M. Chlorogenic acid regulates  
743 apoptosis and stem cell marker-related gene expression in A549 human lung cancer  
744 cells. Mol Cell Biochem. 2018;441(1-2):9-19. doi: 10.1007/s11010-017-3171-1.  
745 PubMed PMID: 28875417.
- 746 50. Tait SWG, Green DR. Mitochondrial Regulation of Cell Death. Csh Perspect  
747 Biol. 2013;5(9). doi: ARTN a008706  
748 10.1101/cshperspect.a008706. PubMed PMID: WOS:000325168700011.
- 749 51. Gross A, McDonnell JM, Korsmeyer SJ. BCL-2 family members and the  
750 mitochondria in apoptosis. Genes Dev. 1999;13(15):1899-911. PubMed PMID:  
751 10444588.
- 752 52. Orrenius S. Reactive oxygen species in mitochondria-mediated cell death. Drug  
753 Metab Rev. 2007;39(2-3):443-55. doi: 10.1080/03602530701468516. PubMed PMID:  
754 17786631.
- 755 53. Jin H, Zhao Y, Yang J, Zhang X, Ma S. Hyperthermia enhances the sensitivity of  
756 pancreatic cancer SW1990 cells to gemcitabine through ROS/JNK signaling.  
757 Oncology letters. 2018;16(5):6742-8.
- 758 54. Cesna V, Sukovas A, Jasukaitiene A, Naginiene R, Barauskas G, Dambrauskas Z,  
759 et al. Narrow line between benefit and harm: Additivity of hyperthermia to cisplatin  
760 cytotoxicity in different gastrointestinal cancer cells. World journal of

- 761 gastroenterology. 2018;24(10):1072.
- 762 55. Mohamed F, Marchettini P, Stuart OA, Urano M, Sugarbaker PH. Thermal  
763 enhancement of new chemotherapeutic agents at moderate hyperthermia. *Annals of*  
764 *surgical oncology*. 2003;10(4):463-8.
- 765 56. Zhao P, Jiang H, Su D, Feng J, Ma S, Zhu X. Inhibition of cell proliferation by  
766 mild hyperthermia at 43 C with Paris Saponin I in the lung adenocarcinoma cell line  
767 PC-9. *Mol Med Rep*. 2015;11(1):327-32.
- 768 57. Feng Q, Sun L, Teng B, Yanping X. Growth inhibitory effect of triptolide  
769 combined with hyperthermia on Hep-2 cells. *Journal of Jilin University (Medicine*  
770 *Edition)*. 2006;(05).
- 771 58. Kampinga HH. Cell biological effects of hyperthermia alone or combined with  
772 radiation or drugs: a short introduction to newcomers in the field. *Int J Hyperther*.  
773 2006;22(3):191-6.
- 774 59. Adachi S, Kokura S, Okayama T, Ishikawa T, Takagi T, Handa O, et al. Effect of  
775 hyperthermia combined with gemcitabine on apoptotic cell death in cultured human  
776 pancreatic cancer cell lines. *Int J Hyperther*. 2009;25(3):210-9. doi: Pii 911094556  
777 10.1080/02656730802657036. PubMed PMID: WOS:000265991500006.

778  
779

## 780 **Supporting information**

781 **S1 Fig. (A) HepG2 and (B) HEK293 cell viability results from MTT assay after**  
782 **the treatments of CGA, EGCG, and TC-HT (10 cycles) alone or in combination**  
783 **(TC-HT + CGA, TC-HT + EGCG) for 24 h.**

784 **S2 Fig. PANC-1 cell viability results from MTT assay after the treatments of**  
785 **gemcitabine (5 µM) and TC-HT (1 cycle and 10 cycles) alone or in combination**  
786 **for 24 h.**

787 **S3 Fig. Raw figures of western blot analysis.**



788 **S1 File. Raw data of cell viability and colony formation results.**

789 **S2 File. Raw data of various time points of temperatures.**

790 **S3 File. Raw data of flow cytometry result.**

791

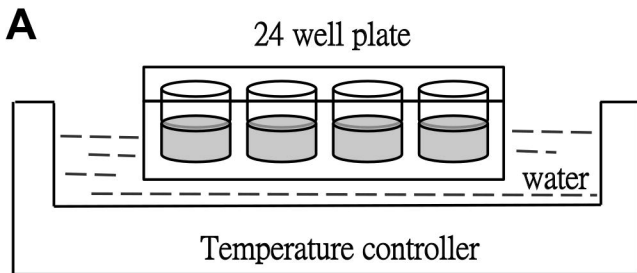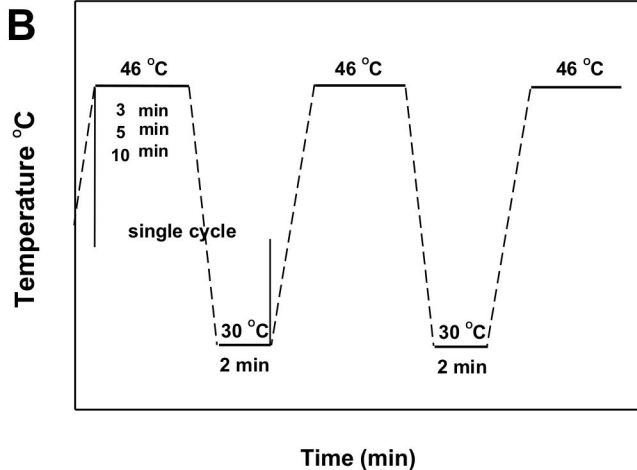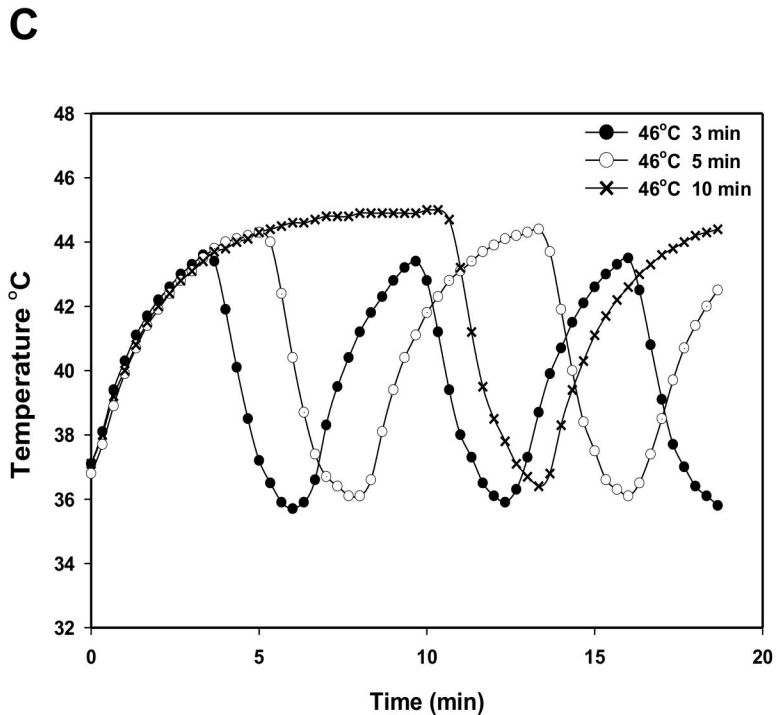

**A**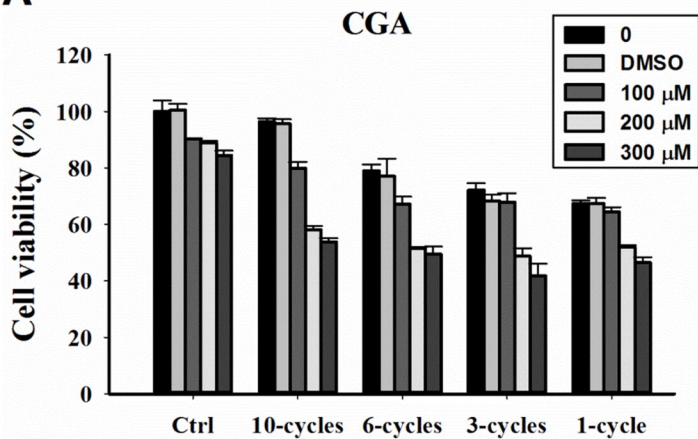**B**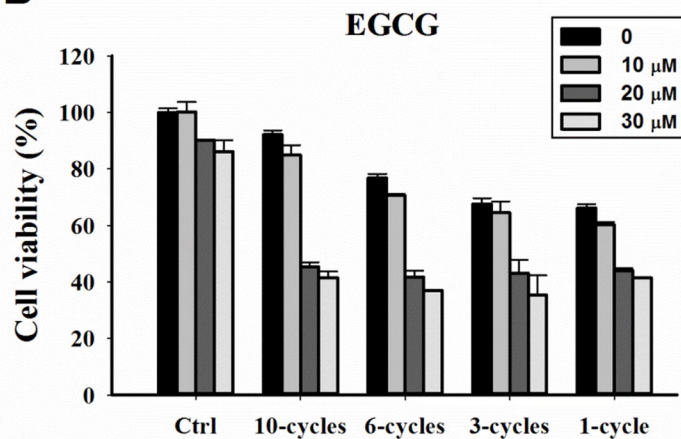**C**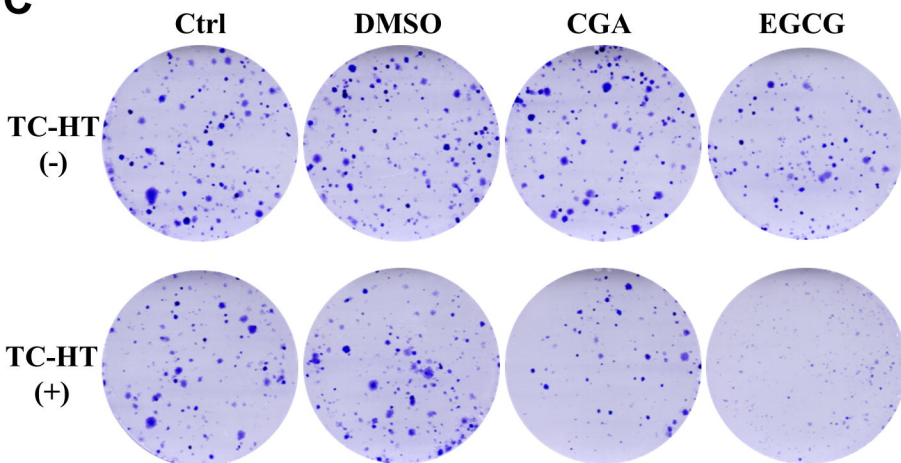**D**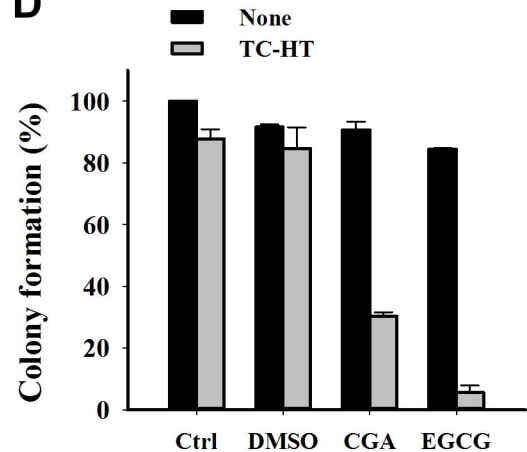

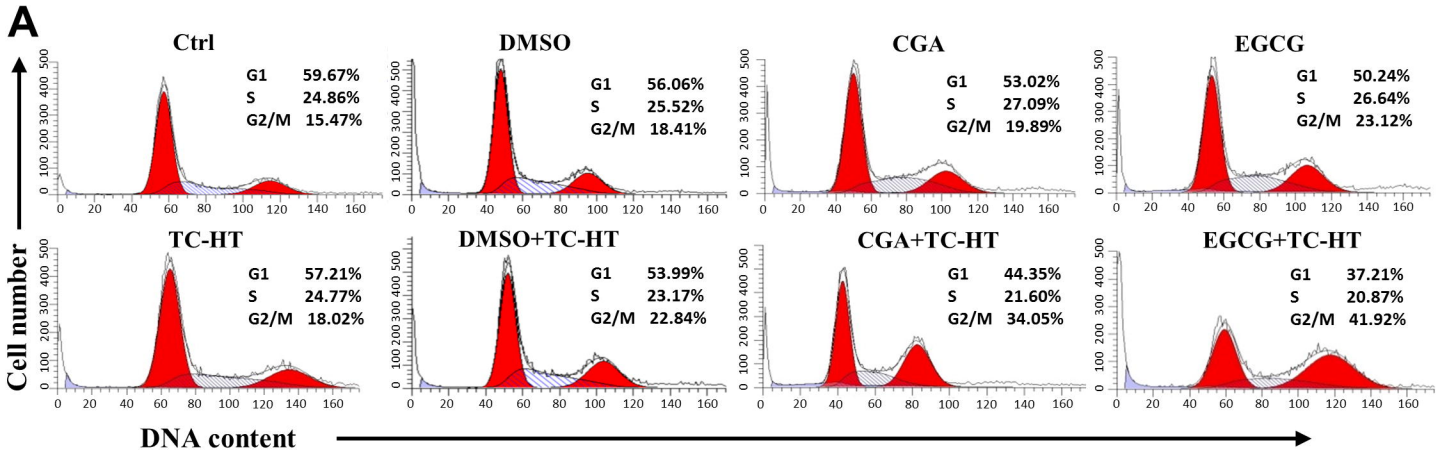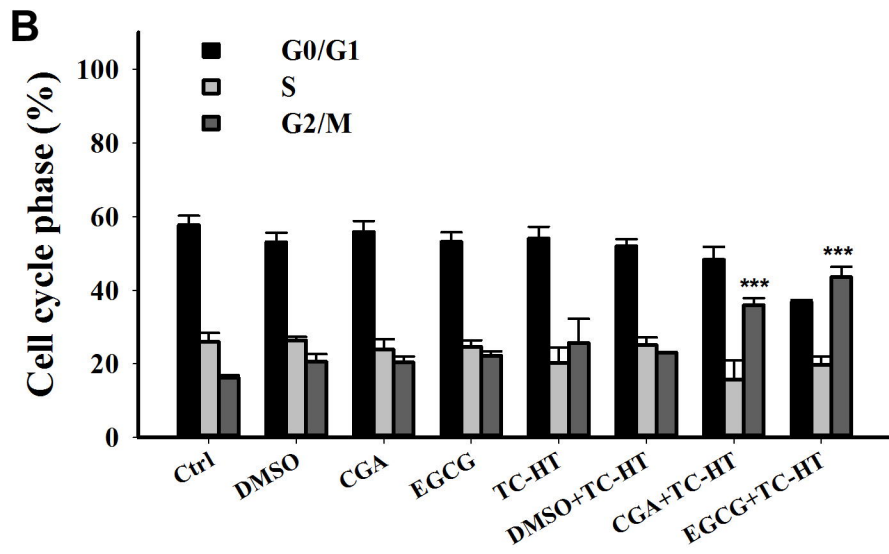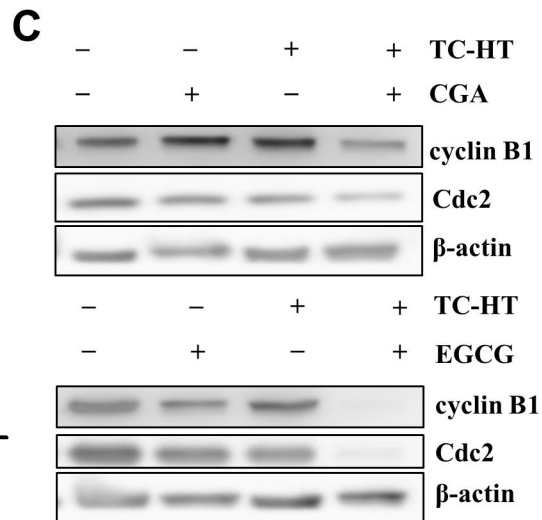

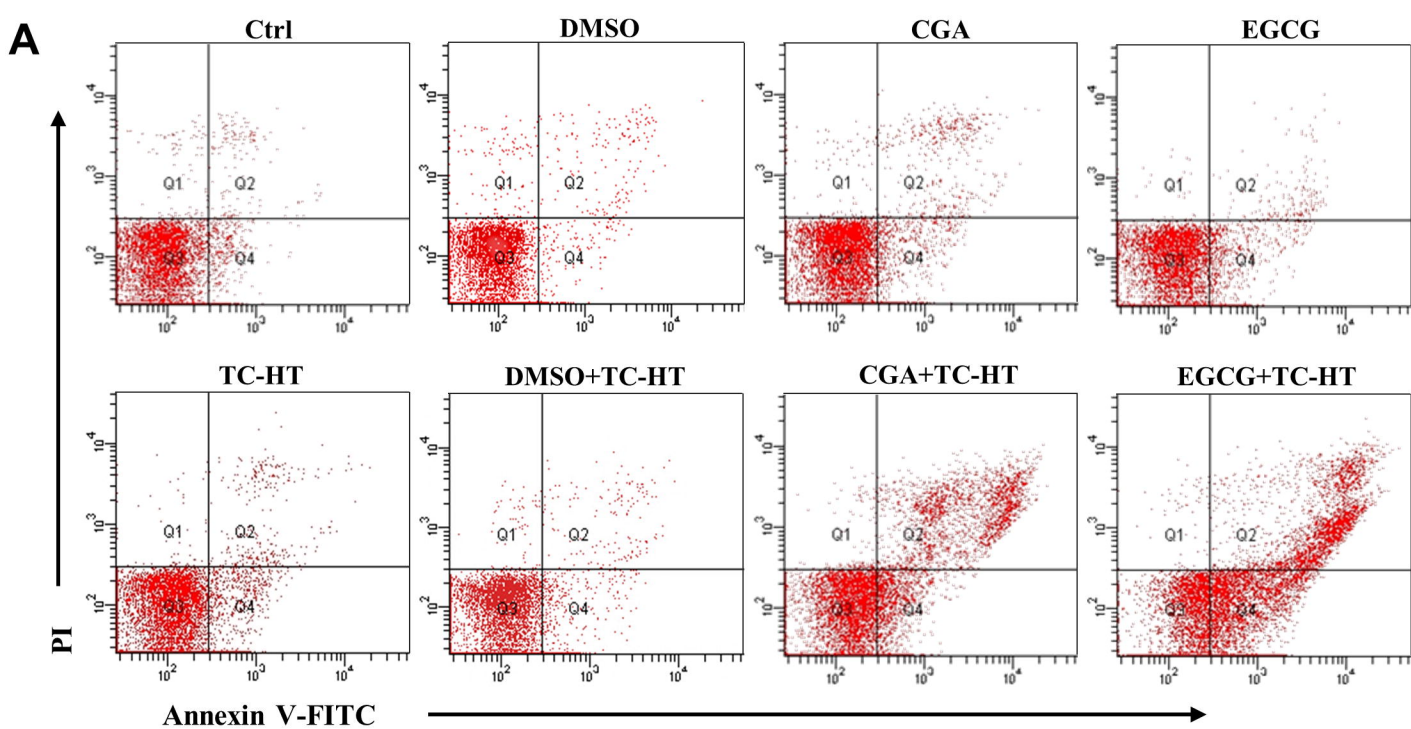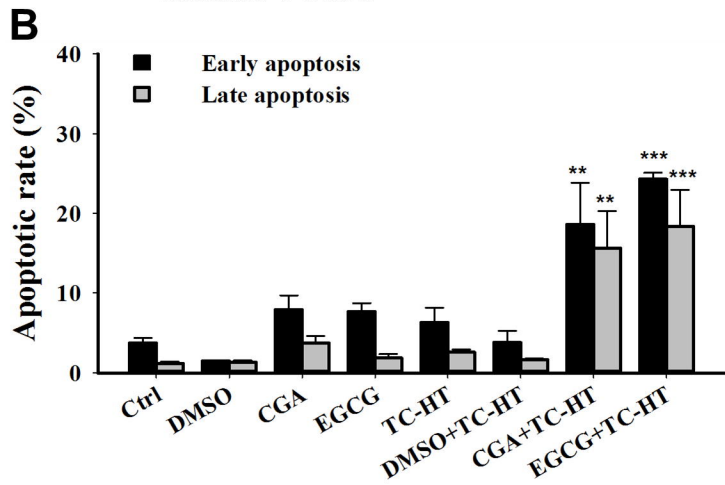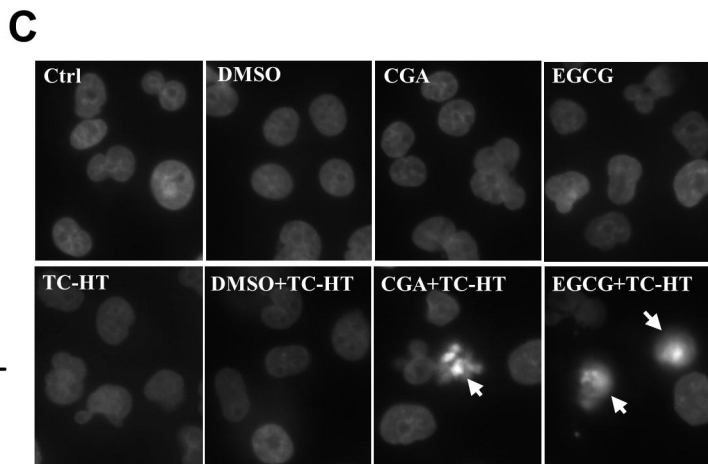

**A**

↑

Cell number

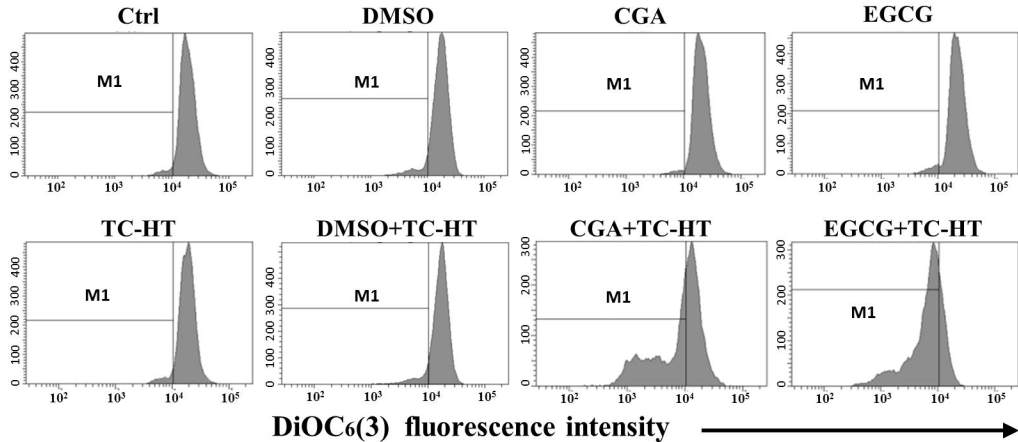**B**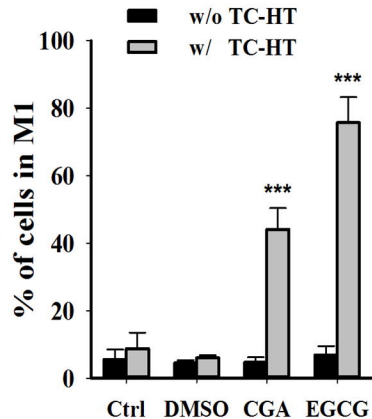

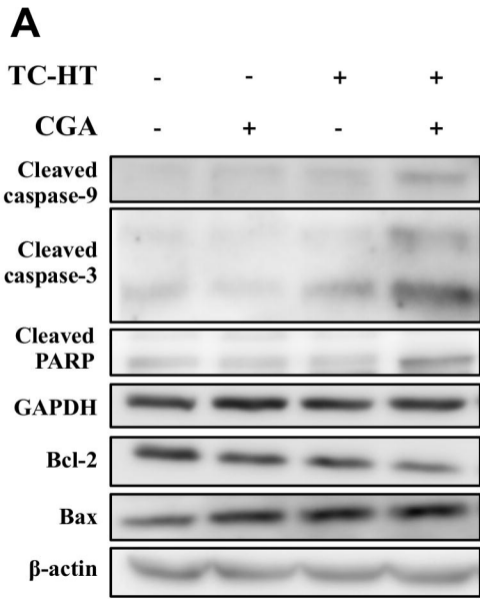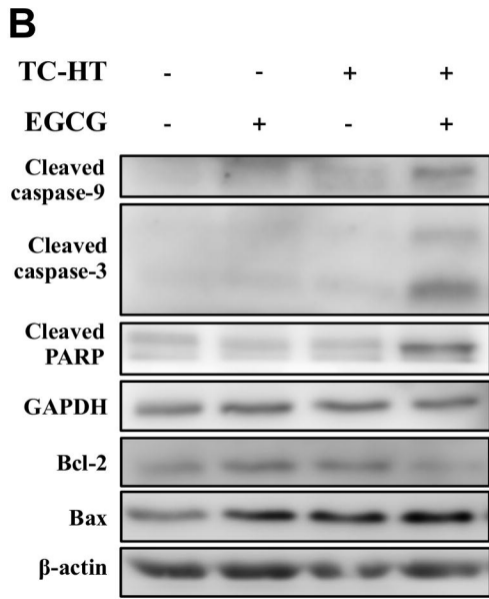

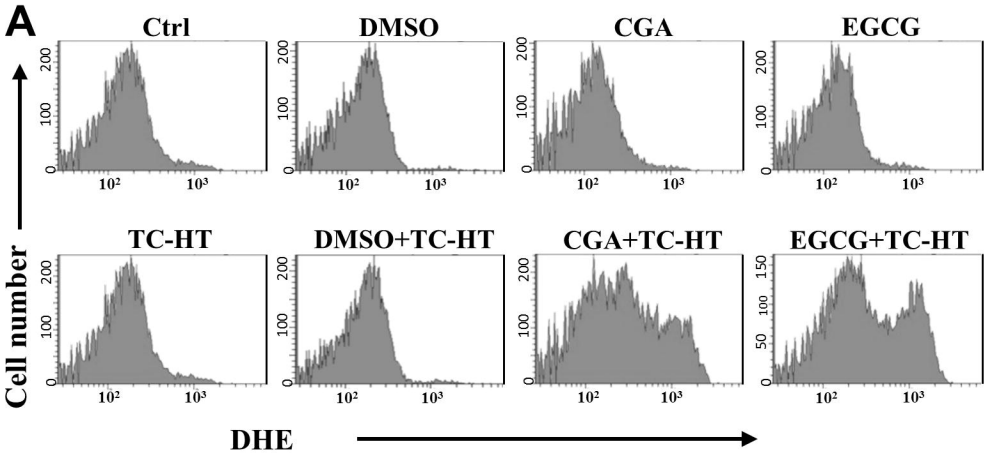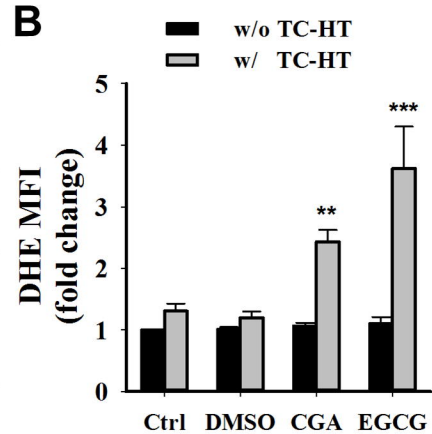



**A****HepG2**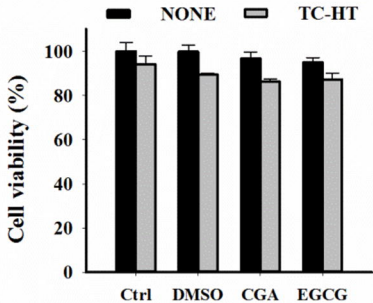**B****HEK293**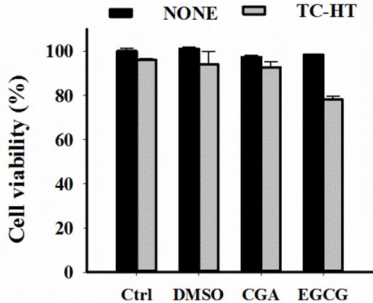

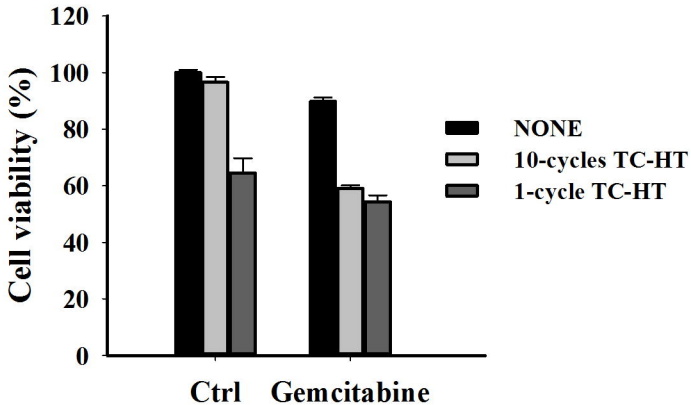

Source: https://www.biorxiv.org/content/10.1101/548552v5.full.pdf
